# Supplementary material for: Evaluating Acceptability and Minimal Sensor Configuration for Home-Based Monitoring of Upper Extremity Use After Stroke
Source: Research Square preprint supplement (doi:10.21203/rs.3.rs-8604323/v1), 2026-02-09

**Supplementary tables**

**Supplementary table S1.** The custom-made acceptability questionnaire

| Part 1. Your thoughts on the sensors | Strongly disagree | |  | | Strongly agree | |
| --- | --- | --- | --- | --- | --- | --- |
|  | 1 | 2 | 3 | 4 | | 5 |
| 1.The sensors were easy to put on and take off |  |  |  |  | |  |
| 2.I would be able to use the sensors on my own |  |  |  |  | |  |
| 3.Wearing the sensors did not limit my ability to move or perform physical activities |  |  |  |  | |  |
| 4.The sensors did not interfere with washing or going to the toilet |  |  |  |  | |  |
| 5. The sensors were comfortable to wear |  |  |  |  | |  |
| 6.I did not experience any itchiness or skin irritations while wearing the sensors |  |  |  |  | |  |
| 7.I found the appearance of the sensors to be appealing |  |  |  |  | |  |
| 8.I found the design of the sensors to be practical |  |  |  |  | |  |
| 9.I would feel comfortable wearing the sensors even if they were visible to family members/close friends |  |  |  |  | |  |
| 10.I would feel comfortable wearing the sensors even if they were visible to acquaintances |  |  |  |  | |  |
| 11.I did not feel anxious while wearing the sensors |  |  |  |  | |  |
| 12.I would find it easy to integrate the sensors into my daily life |  |  |  |  | |  |
| 13.I would be willing to wear the sensors continuously for long term use if beneficial for my rehabilitation |  |  |  |  | |  |
| 14.I would be willing to wear the sensors in my daily life if recommended by a therapist |  |  |  |  | |  |

**Part 2**

1. What do you like about the sensors?
2. What do you dislike about the sensors?
3. Do you have any ideas for improving the sensors?
4. Which sensors were annoying? Why?
5. Which sensors were comfortable and did not limit your movements?

**Supplementary table S2.** How much time each participant spent detaching the sensors. All numbers are in seconds. S1=sternum sensor. S2=shoulder affected sensors. S3=shoulder non-affected sensor. S4=upper arm affected sensor. S5=upper arm non-affected sensor. S6=forearm affected sensor. S7=forearm non-affected sensor. S8=hand affected sensor. S9=hand non-affected sensor. TT=Total time *= Did not attempt detaching / time used before participant gave up detaching.


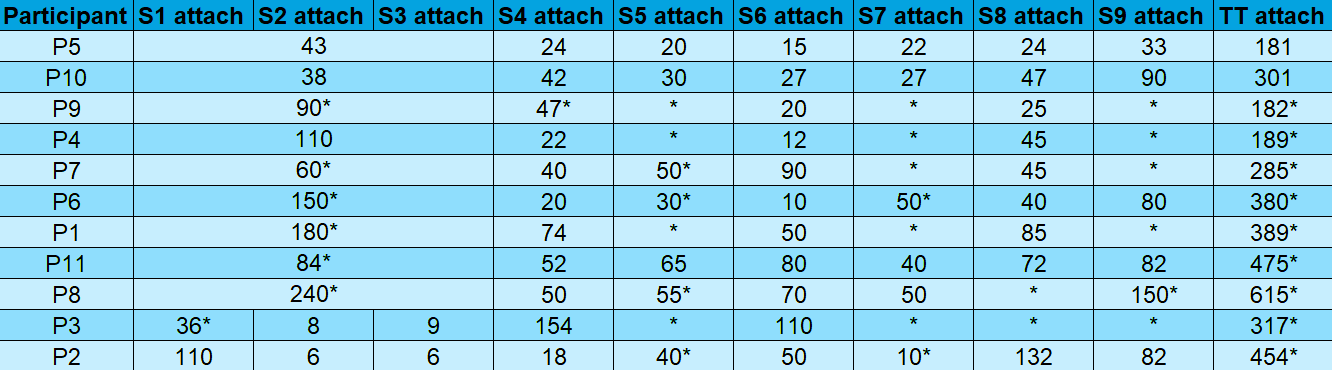


**Supplementary table S3.** How much time each participant spent detaching the sensors. All numbers are in seconds. S1=sternum sensor. S2=shoulder affected sensors. S3=shoulder non-affected sensor. S4=upper arm affected sensor. S5=upper arm non-affected sensor. S6=forearm affected sensor. S7=forearm non-affected sensor. S8=hand affected sensor. S9=hand non-affected sensor. TT=Total time *= Did not attempt detaching / time used before participant gave up detaching.


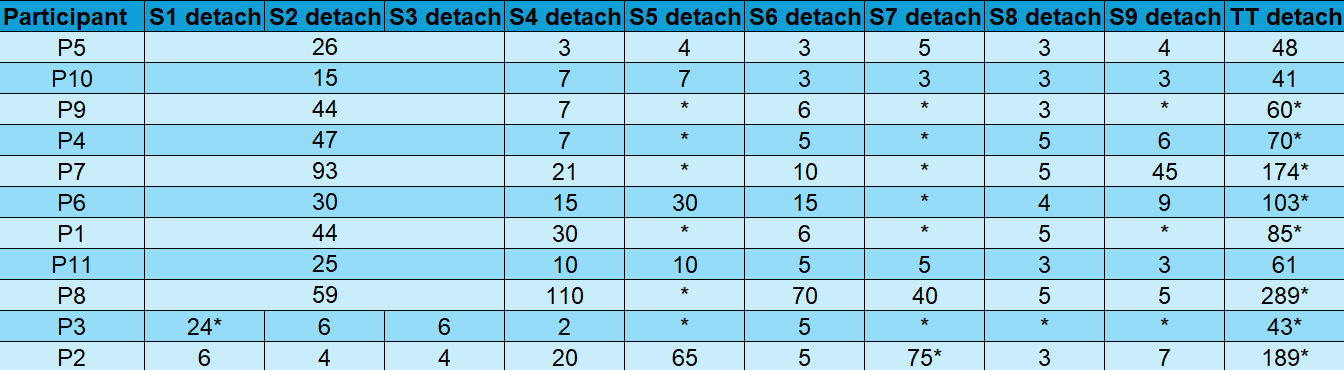


**Supplementary table S4.** Distribution of answer themes on the open-ended items in the custom-made acceptability questionnaire. Providing details and examples behind the various themes. N = Number of participants mentioning the theme. The details are written in a descending order of frequency, with the most common response listed first.

**
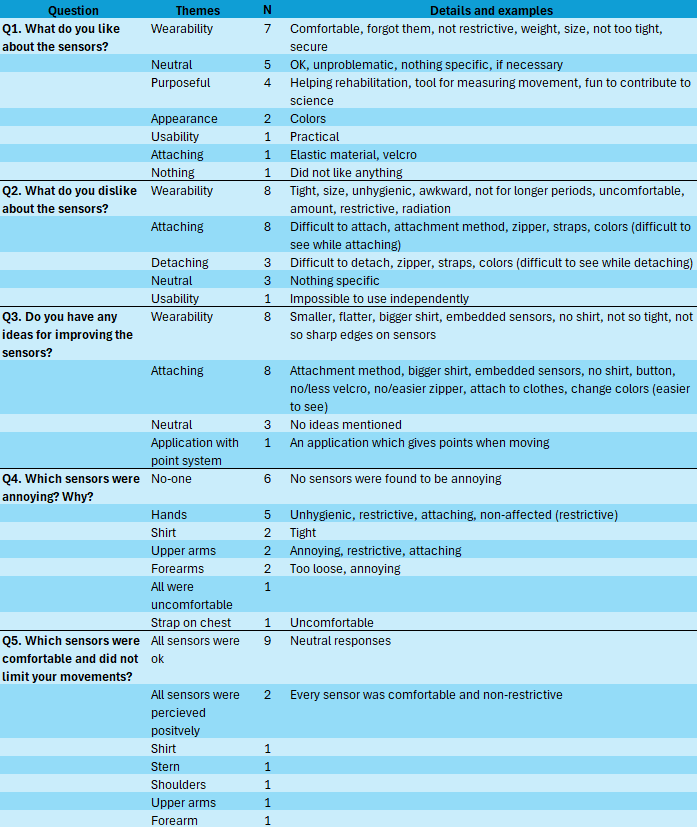
**

**Supplementary figures**

**Supplementary fig. S1.** Correlation heatmap of all the items in the custom-made acceptability questionnaire. Item 11 is not included, as it had no variance.


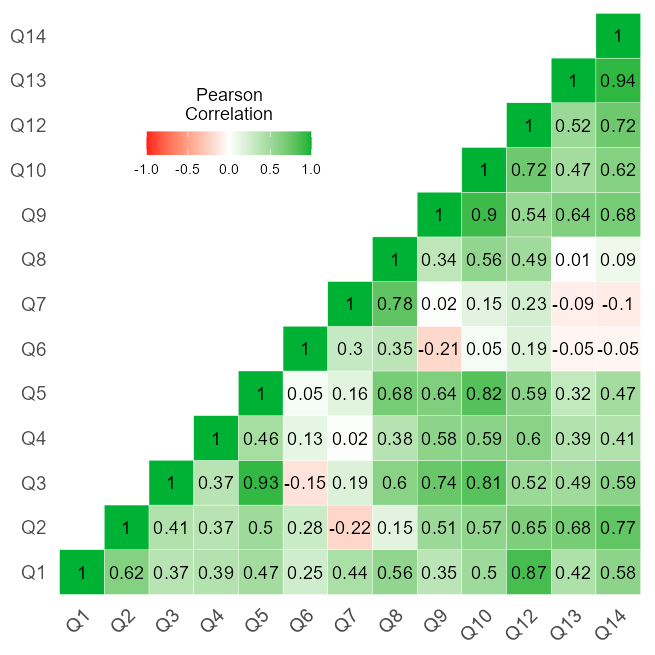

Supplement: Supplementary file 1 [file fe1cb42b7f780dbdd561de27.docx]
